# Supplementary material for: Phase transitions, screening and dielectric response of CsPbBr3
Source: Royal Society of Chemistry journal article supplement (doi:10.1039/d0ta04155f), 2020-01-01
Supplement: d0ta04155f1.pdf [file d0ta04155f1.pdf]

## *Supplementary Information*

### **Phase Transitions, Screening and Dielectric Response of CsPbBr<sub>3</sub>**

Šarūnas Svirskas<sup>1\*</sup>, Sergejus Balčiūnas<sup>1</sup>, Mantas Šimėnas<sup>1</sup>, Gediminas Usevičius<sup>1</sup>, Martynas Kinka<sup>1</sup>, Martynas Velička<sup>1</sup>, Dominik Kubicki<sup>2</sup>, Marianela Escobar Castillo<sup>3</sup>, Andrei Karabanov<sup>3</sup>, Vladimir V. Shvartsman<sup>3</sup>, Maria de Rosário Soares<sup>4</sup>, Valdas Šablinskas<sup>1</sup>, Andrei N. Salak<sup>5</sup>, Doru C. Lupascu<sup>3</sup>, Jūras Banys<sup>1</sup>

<sup>1</sup>*Faculty of Physics, Vilnius University, Sauletekio al. 9, LT-10222 Vilnius, Lithuania*

<sup>2</sup>*Institute of Chemical Sciences and Engineering, School of Basic Sciences, Ecole Polytechnique Fédérale de Lausanne, CH-1015 Lausanne, Switzerland*

<sup>3</sup>*Institute for Materials Science and Center for Nanointegration Duisburg-Essen (CENIDE), University of Duisburg-Essen, Essen, Germany*

<sup>4</sup>*Central Analytical Laboratory, CICECO-Aveiro Institute of Materials, University of Aveiro, 3810-193 Aveiro, Portugal*

<sup>5</sup>*Department of Materials and Ceramics Engineering, CICECO-Aveiro Institute of Materials, University of Aveiro, 3810-193 Aveiro, Portugal*

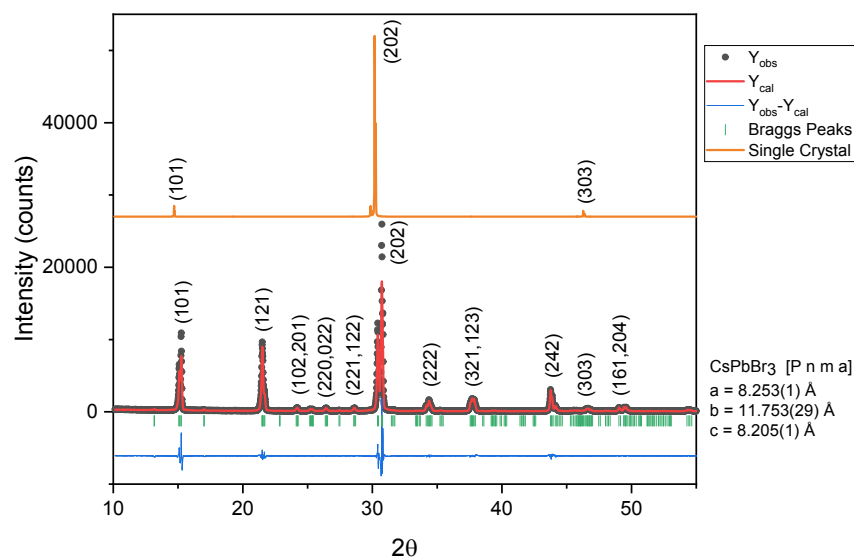

**Figure S1.** X-ray diffractogram of CsPbBr<sub>3</sub> single crystal.

**Table S1.** Selected crystallographic data for the annealed CsPbBr<sub>3</sub> powder sample obtained using the laboratory X-ray ( $T = 215$  K, Cu  $K\alpha$  radiation,  $\lambda\alpha_1 = 1.54053$  Å,  $\lambda\alpha_2 = 1.54431$  Å) and refined in the *Pnma* space group ( $\sqrt{2}a_p \times 2a_p \times \sqrt{2}a_p$  superstructure).

|                                       |                     |
|---------------------------------------|---------------------|
| Chemical formula                      | CsPbBr <sub>3</sub> |
| Formula weight (g·mol <sup>-1</sup> ) | 579.81              |
| Crystal system                        | Orthorhombic        |
| Space group (No.)                     | <i>Pnma</i> (62)    |
| $a$ (Å)                               | 8.2745(3)           |
| $b$ (Å)                               | 11.7116(3)          |
| $c$ (Å)                               | 8.1249(3)           |
| $V$ (Å <sup>3</sup> )                 | 787.375(44)         |
| $Z$                                   | 4                   |
| $d$ -space range (Å)                  | 7.3539 - 1.6685     |
| $\chi^2$                              | 2.85                |
| $R_p$ (%)                             | 3.14                |
| $R_{wp}$ (%)                          | 4.25                |

For definition of the agreement factors  $\chi^2$ ,  $R_p$  and  $R_{wp}$  see Ref. <sup>1</sup>.

**Table S2.** Selected crystallographic data for the annealed CsPbBr<sub>3</sub> powder sample obtained using the laboratory X-ray ( $T = 210$  K, Cu  $K\alpha$  radiation,  $\lambda\alpha_1 = 1.54053$  Å,  $\lambda\alpha_2 = 1.54431$  Å) and refined in the *Pnma* space group ( $\sqrt{2}a_p \times 2a_p \times \sqrt{2}a_p$  superstructure).

---

|                                       |                     |
|---------------------------------------|---------------------|
| Chemical formula                      | CsPbBr <sub>3</sub> |
| Formula weight (g·mol <sup>-1</sup> ) | 579.81              |
| Crystal system                        | Orthorhombic        |
| Space group (No.)                     | <i>Pnma</i> (62)    |
| <i>a</i> (Å)                          | 8.2819(3)           |
| <i>b</i> (Å)                          | 11.7153(3)          |
| <i>c</i> (Å)                          | 8.1209(2)           |
| <i>V</i> (Å <sup>3</sup> )            | 787.939(42)         |
| <i>Z</i>                              | 4                   |
| <i>d</i> -space range (Å)             | 7.3539 - 1.6685     |
| $\chi^2$                              | 2.83                |
| <i>R</i> <sub>p</sub> (%)             | 3.03                |
| <i>R</i> <sub>wp</sub> (%)            | 4.09                |

---

For definition of the agreement factors  $\chi^2$ , *R*<sub>p</sub> and *R*<sub>wp</sub> see Ref.<sup>1</sup>

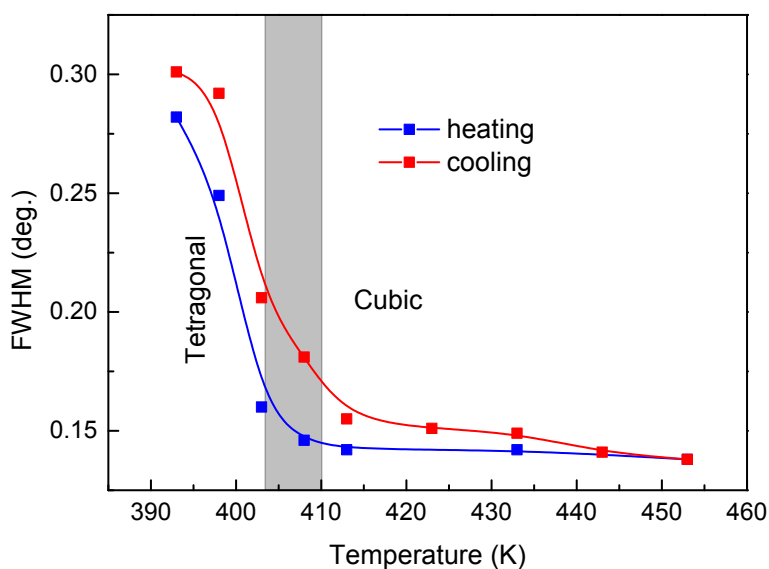

**Figure S2.** Full width at half maximum (FWHM) of the (002)<sub>p</sub> multiplet in the XRD patterns of CsPbBr<sub>3</sub> in the vicinity of the *Pbnm* - *P4/mbm* phase transition recorded upon heating and upon cooling.

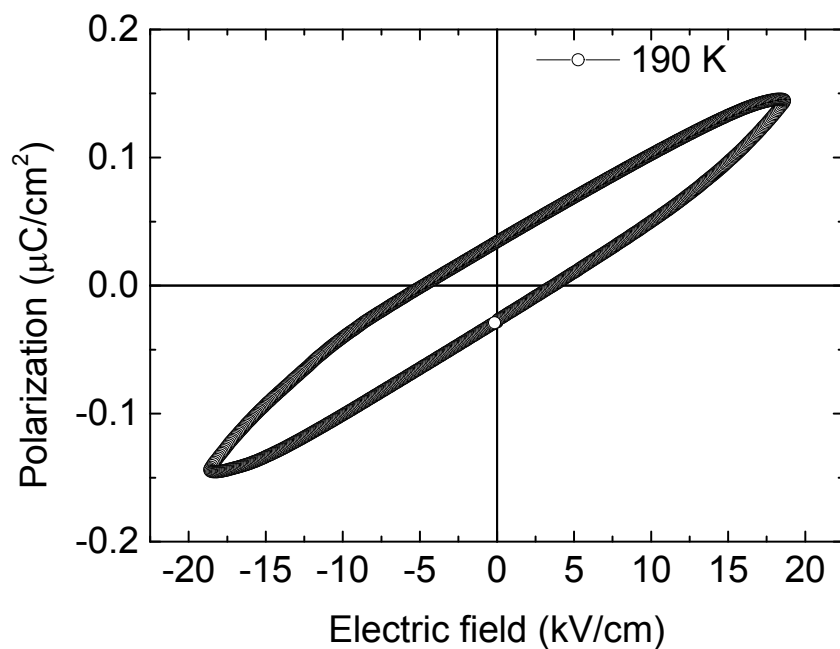

**Figure S3.** Electric field dependence of polarization on electric field at  $T = 190$  K.

Figure S3 represents the electric field dependence of polarization in  $\text{CsPbBr}_3$  single crystal at 190 K temperature. It is evident that no polarization switching is observed up to 20  $\text{kV}/\text{cm}$ .

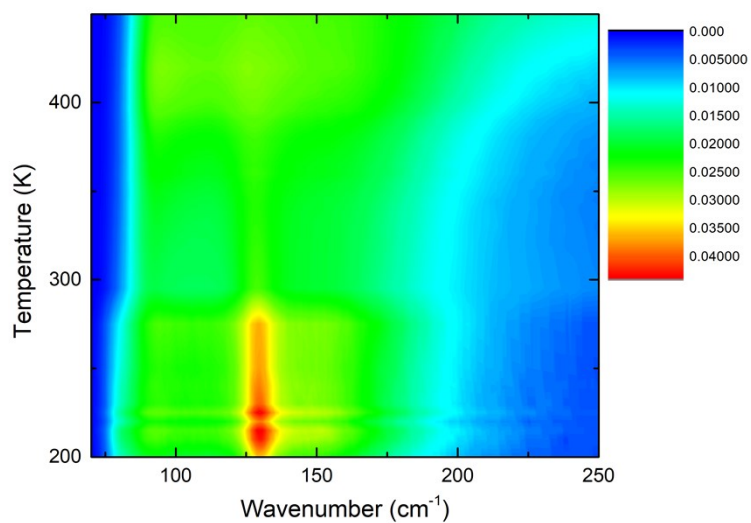

**Figure S4.** Raman scattering spectra of CsPbBr<sub>3</sub> at different temperatures.

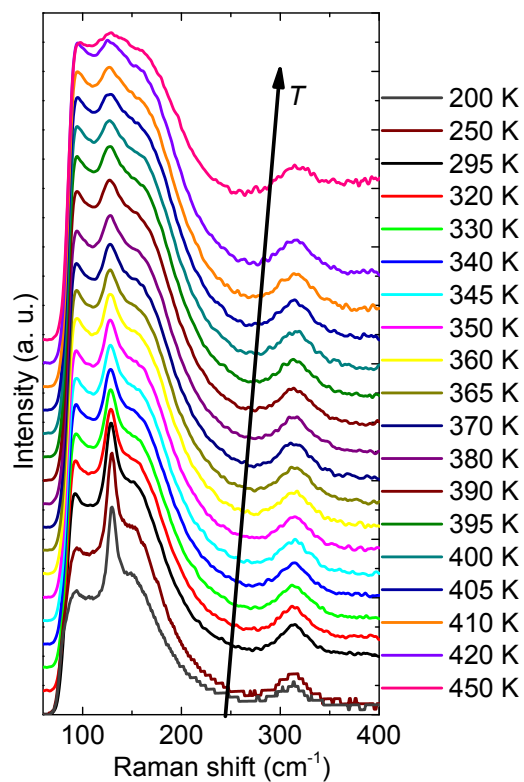

**Figure S5.** Raman scattering spectra of CsPbBr<sub>3</sub> at different temperatures.

## References

<sup>1</sup> J. Rodríguez-Carvajal, *Physica B: Condensed Matter* **192**, 55 (1993).
